# Supplementary material for: Between Two Models: Exploring Exchange and Direct Procurement Strategies for Natufian Food Processing Tools of el-Wad Terrace, Israel
Source: Research Square preprint supplement (doi:10.21203/rs.3.rs-107065/v1), 2020-11-24
Supplement: Supplementary file 1 [file 69483182548c2ee2e8bd4db0.xlsx]

## Sheet: Table-S1
	Early Natufian																																															Late Natufian
Sample#	EWT101	EWT102	EWT103	EWT105	EWT106	EWT107	EWT110	EWT111	EWT114	EWT115	EWT116	EWT118	EWT120	EWT121	EWT122	EWT124	EWT125	EWT128	EWT133	EWT136	EWT138	EWT139	EWT140	EWT187	EWT188	EWT189	EWT19	EWT200	EWT22	EWT25	EWT27	EWT32	EWT39	EWT40	EWT41	EWT48	EWT52	EWT53	EWT56	EWT59	EWT67	EWT71	EWT82	EWT83	EWT84	EWT99	EWT69	EWT131	EWT137
SiO2 (%)	46.38	47.23	47.75	47.5	45.91	47.9	46.34	47.82	46.22	46.82	45.61	46.81	47.88	46.68	47.28	47.48	46.7	46.3	47.17	47.71	46.66	47.75	47.09	49.31	46.3788	46.53	48.04	47.32	44.28	47.37	47.47	46.94	46.56	47.21	47.63	48.38	46.22	47.03	46.74	44.4	47.0539	46.24	45.38	47.37	47.54	46.83	47.99	47.46	47.41
Al2O3	15.79	15.24	14.54	14.57	13.62	15.24	14.67	15.07	14.17	15.7	14.97	15.96	15.89	15.74	15.3	14.26	15.92	14.73	15.52	14.42	15.72	14.79	14.35	16.36	14.8546	15.03	15.78	15.29	14	14.54	15.05	15.77	16.01	14.48	15.73	15.57	14.09	14.2	15.47	13.44	14.3485	14.5	14.28	14.78	15.06	13.9	15.55	15.45	14.52
Fe2O3(t)	12.62	11.7	12.79	12.98	12.45	12.51	13.12	12.7	13.34	12.54	13.9	12.95	12.23	12.91	13.16	13.27	13.03	13.06	12.46	12.86	12.44	12.96	12.85	11.55	12.1197	12.82	12.03	12.39	13.5	13.18	13.16	12.48	12.32	13.07	12.24	12.79	12.9	13.22	12.67	12.88	11.8885	13.09	13.52	12.86	12.91	13.29	12.25	13.31	13.01
MnO	0.17	0.16	0.17	0.17	0.16	0.17	0.17	0.17	0.17	0.17	0.19	0.17	0.16	0.18	0.18	0.17	0.17	0.16	0.17	0.17	0.17	0.17	0.18	0.15	0.156247	0.18	0.16	0.16	0.17	0.17	0.17	0.17	0.17	0.17	0.17	0.16	0.16	0.17	0.18	0.17	0.146926	0.16	0.17	0.17	0.17	0.18	0.17	0.16	0.17
MgO	5.98	6.7	10.14	9.87	9.86	8.52	7.45	9.13	8.78	5.67	5.02	6.19	5.58	5.8	8.66	10.4	6.32	7.73	5.71	9.56	6.21	8.85	9.96	5.1	7.19153	6.67	5.32	6.4	7.21	9.54	7.67	5.86	6.37	9.59	6.01	8.79	8.54	10.05	7.07	9.75	6.98784	7.42	8.51	9.91	8.28	10.38	6.62	6.93	9.81
CaO	11.83	10.79	9.02	9.38	10.86	9.55	10.01	9.5	9.61	12.37	11.8	11	10	10.62	9.89	9.27	10.83	9.6	10.21	9.56	11.06	9.38	9.32	9.57	10.1854	11.26	9.86	9.73	12.25	9.11	9.84	10.94	10.52	9.25	11.51	8.7	9.44	9.41	10.84	11.02	10.6357	9.96	10.72	9.46	9.92	8.88	11.16	9.75	9.28
Na2O	3.04	3.5	2.95	2.9	2.91	2.92	3.35	2.95	3.21	3.02	3.3	3.35	3.77	3.39	3.14	2.83	2.92	3.76	3.59	2.97	3.38	3.01	2.96	3.76	3.40336	3.2	3.88	3.87	3.44	2.95	3.27	3.33	3.25	2.95	3.12	3.28	3.52	2.81	3.07	3.39	3.25015	3.45	3.56	2.95	2.72	3.01	3.09	3.12	2.89
K2O	1.03	1.41	0.86	0.71	1.05	0.86	1.07	0.83	1.08	0.77	1.15	0.95	1.42	1.1	0.66	0.64	1.01	1.25	1.45	0.71	1.06	0.81	1.09	1.44	1.19949	1.03	1.47	1.39	1.33	0.74	0.75	1.09	1.03	0.77	0.86	0.72	1.28	0.73	1.02	1.26	1.12049	1.09	1.06	0.83	1.17	1.13	0.83	0.86	0.72
TiO2	2.435	2.512	1.709	1.87	2.337	1.822	2.82	1.772	2.522	2.411	3.099	2.62	2.667	2.534	1.84	1.878	2.51	2.427	2.731	1.909	2.329	2.207	2.1	2.42	2.31148	2.402	2.838	2.602	2.403	2.091	2.09	2.494	2.273	2.08	2.085	1.676	2.672	2.14	2.138	2.474	2.35457	2.702	2.396	1.717	2.215	2.144	2.132	2.735	1.884
P2O5	0.87	0.56	0.27	0.3	0.58	0.28	0.8	0.29	0.73	0.5	1.04	0.42	0.82	0.9	0.25	0.21	0.85	0.8	1.03	0.28	0.89	0.33	0.4	0.56	n.n.	0.81	0.84	0.82	1.09	0.29	0.51	0.94	0.79	0.31	0.47	0.25	0.91	0.4	0.77	0.96	n.n.	0.77	0.62	0.28	0.5	0.41	0.55	0.33	0.34
Sc (µg/g)	24.6333	22.8067	23.5433	25.3833	24.3567	24	20.3967	26.18	20.9833	26.5033	22.7533	25.2467	20.6067	22.85	24.93	24.2167	24.95	20.3333	19.64	25.0067	23.7967	23.9133	28.2233	20.0533	19.66	24.2567	20.3367	21.9	20.6167	25.1333	25.0733	22.46	22.4833	25.2167	23.1733	21.0867	18.88	23.16	21.7833	20.0033	20.9567	22.19	16.75	21.55	26.3867	26.7867	24.1667	25.4233	23.18
V	227.88	207.907	223.493	218.13	221.687	225.873	212.357	217.087	210.203	243.03	307.107	214.713	226.853	208.68	235.123	239.19	248.77	210.9	223.323	238.09	247.887	233.723	230.987	212.81	188.663	237.853	234.69	202.943	193.253	211.273	218.227	232.993	257.713	205.513	240.987	192.533	187.803	219.713	226.427	221.17	228.933	213.09	164.3	213.945	274.673	221.51	235.077	220.23	227.827
Cr	91.0933	232.815	381.057	317.257	310.05	330.437	162.695	315.15	264.073	233.21	48.35	189.717	112.463	76.4967	329.127	362.913	125.267	203.74	79.6867	368.977	118.29	314.64	348.563	93.0633	184.683	214.727	102.695	135.613	203.497	308.36	276.103	111.795	122.873	292.627	205.187	258.043	338.905	315.877	147.1	275.943	256.27	193.2	190.155	318.15	345.23	335.557	225.11	210.88	262.5
Co	44.4567	42.71	70.0267	62.79	59.7	59.9867	53.62	60.96	60.38	40.4833	43.33	48.94	43.5233	41.2567	61.75	71.3567	45.3067	55.6667	42.5433	63.4167	45.1833	60.94	64.1967	39.7233	47.3267	45.6	42.34	43.31	49.6067	60.8233	55.96	41.0333	48.87	60.2233	49.3867	64.0133	51.23	67.2633	48.1533	61.8367	47.4267	53.5233	44.6	54.01	53.89	64.5033	48.6467	52.7233	61.74
Ni	62.42	95.7	328.987	266.58	284.863	241.377	159.497	260.657	218.867	61.05	38.4933	88.62	72.2833	50.9433	223.233	321.843	67.4	193.247	74.5833	272.63	65.8867	208.167	272.297	53.95	141.42	69.7033	64.59	89.9033	159.59	228.66	161.69	55.5167	76.45	238.957	82.38	238.34	194.107	266.88	77.23	275.34	136.4	167.257	137.01	230.01	211.79	273.53	76.85	99.1667	255.23
Cu	42.0767	32.69	49.8	53.5267	45.07	59.3033	43.8467	60.6167	40.9367	45.3667	58.2367	40.6367	43.0333	37.3067	56.95	51.71	35.6333	39.6833	23.83	49.51	35.8233	18.15	39.08	31.9967	43.21	34.3167	37.7	42.1467	32.25	37.9167	41.8367	28.39	27.3	34.5733	50.2433	26.4933	22.3667	19.4067	24.2233	46.8733	26.8867	36.295	51.45	54.145	44.135	34.4667	33.19	34.0567	51.79
Ga	22.56	23.1233	21.22	20.0833	20.22	21.44	23.5633	20.6167	21.8233	23.5533	26.2067	22.75	24.8433	24.2933	21.8133	21.1733	24.0833	23.5333	24.26	21.6067	23.0967	22.22	21.3267	25.41	23.44	22.61	25.82	23.37	20.63	19.8233	21.9767	23.3567	23.99	19.7967	24	22.0733	21.01	20.44	23.5967	22.1233	23.3567	22.3333	25.87	17.975	21.1867	20.23	23.2033	22.6433	21.43
Rb	14.0433	21.3067	15.8367	9.81333	14.08	14.93	14.57	14.2167	12.2667	9.60333	17.94	10.9967	19.82	15.1667	10.8333	10.8667	12.7933	14.4233	18.35	12.41	13.7933	11.7533	16.3867	21.3333	18.52	14.5333	20.2233	18.8	14.8633	10.0267	8.29667	15.89	13.7433	9.97	11.6967	9.96	13.27	10.6767	16.4733	15.7	14.33	10.8667	23.275	12.28	15.6367	17.91	9.89667	11.5533	11.3667
Sr	770.757	710.08	413.497	388.37	666.037	414.343	990.727	414.953	927.833	523.753	739.277	626.803	1080	788.473	359.393	374.063	755.37	988.413	1140.25	373.497	733.18	481.183	511.01	661.743	996.313	797.16	1230	1060	1220	465.577	630.707	777.76	758.29	462.81	541.94	448.357	1090	466.603	771.1	1120	829.437	1010	983.93	386.125	532.675	478.543	570.297	552.11	393.363
Y	26.2167	26.0933	18.0033	28.2433	21.1	28.48	20.8767	44.92	30.1867	21.3433	33.0333	21.2933	42.2667	26.23	18.4933	27.56	36.4033	19.9867	24.13	28.2133	24.4633	33.7833	22.7033	24.1733	20.95	22.33	31.4	51.3	25.14	62.2167	50.86	23.4	21.1867	18.0867	20.2	22.8433	21.34	16.4767	20.5233	20.5167	19.6867	21.2433	21.9465	19.6892	23.5553	22.87	21.7133	18.01	18.13
Zr	221.163	209.933	112.89	116.513	158.74	121.13	175.117	132.14	167.587	172.623	218.107	164.52	225.517	221.547	120.907	91.4767	214.423	173.413	212.853	103.22	198.187	129.637	201.073	208.41	160.917	183.963	222.49	229.55	215.107	132.89	148.393	191.433	186.833	131.39	134.16	96.8933	212.757	124.78	175.2	161.72	163.023	182.287	155.203	118.495	178.845	208.817	131.867	138.2	108.283
Nb	51.0767	43.5433	21.77	21.07	41.2567	22.83	40.5267	23.55	41.0333	37.82	62.28	27.36	55.8967	47.55	18.9433	18.0367	54.6233	44.72	54.3233	19.8567	50.7733	22.87	32.0733	40.68	35.5	48.39	53.72	53.2233	55.7667	21.5667	26.8833	50.2067	49.1133	21.7533	28.8633	17.98	57.0833	20.42	45.75	46.5233	37.1267	41.3033	40.805	21.465	30.79	33.0133	27.3767	26.3433	22.33
Ba	314.673	341.503	230.01	168.697	311.207	224.7	393.003	225.257	360.67	214.677	369.293	226.723	447.297	337.947	160.253	162.607	308.393	417.037	466.11	171.88	289.1	206.14	257.277	310.663	500.203	338.45	464.293	435.033	561.413	184.447	236.203	352.867	297.62	185.997	248.903	190.343	471.157	190.083	330.273	471.703	360.98	385.433	447.767	207.865	348.11	247.82	233.447	211.903	186.067
La	37.76	33.57	17.51	14.08	30.48	17.8433	39.06	18.1767	33.79	20.2333	41.5867	20.4	46.0533	39.4167	14.0933	11.9067	36.7067	40.92	46.2933	13.7733	37.45	17.0467	25.5833	31.0267	40.76	34.7567	44.0367	45.9367	62.3867	16.6	26.3833	37.1967	32.2533	16.3433	22.7067	13.24	47.7633	16.1967	32.0667	46.1733	32.5867	38.3567	33.792	16.1864	24.749	25.3233	25.4767	16.1533	14.17
Ce	74.93	66.5567	39.1233	29.5633	60.21	40.0767	88.4133	37.6133	74.69	44.3767	93.2167	43.8867	97.5533	80.1267	31.18	28.36	76.5533	85.63	97.6633	32.24	81.2	39.2	52.45	66.66	81.5233	77.02	97.4033	90.5567	109.2	34.66	53.5933	82.03	71.8167	33.71	50.7633	30.2133	98.5767	35.5833	70.99	103.09	70.7267	81.0633	74.8664	38.4176	57.1058	51.4	56.33	37.0433	32.09
Pr	9.34333	8.18	4.52	3.85667	7.24	4.71667	10.2933	4.69667	8.87667	5.78667	10.93	5.77	11.1733	9.88667	3.82333	3.41333	9.53	9.80667	11.3733	3.93667	9.77333	4.69	6.56333	7.95	9.35	9.15333	11.2167	11.0733	12.8067	4.42667	6.58	9.67333	8.55333	4.33	5.99	3.54667	11.4933	4.37667	8.43333	11.5967	8.30333	9.84333	7.53	4.3	6.52333	6.46667	6.82	4.79333	3.93667
Nd	40.01	35.2767	19.2233	17.1667	30.66	20.0467	42.2167	20.25	36.4367	25.4333	44.69	25.3033	45.3667	41.6433	16.6767	14.9867	39.86	39.47	45.7867	17.19	40.46	20.0733	28.48	32.5433	37.7833	37.7533	45.13	45.7433	52.2133	19.77	28.3733	39.68	34.8267	19.2633	25.3067	14.7933	46.1	18.6433	33.9767	45.8533	34.0833	41.4133	36.775	18.38	28.28	27.7367	28.7033	20.9167	16.99
Sm	8.21667	7.72667	4.16333	4.21	6.44	4.42	8.47	4.78	7.33667	5.72333	9.24667	5.89	8.93333	8.44333	3.88333	3.62667	8.21	7.67667	8.85667	4.19	8.31667	4.42667	6.3	7.05667	7.52	7.84667	8.90667	8.93667	9.69	4.56667	6.09333	8	7.30333	4.51	5.60333	3.48	9.00667	4.34	6.92333	8.74333	6.93	8.27	7.04	4.3	6.37667	6.13667	6.23	4.85333	4.03667
Eu	2.67667	2.39333	1.40333	1.41667	2.077	1.55467	2.73333	1.55633	2.52267	2.03933	3.00333	1.974	2.84	2.71667	1.434	1.30067	2.70667	2.59933	2.96333	1.42167	2.59	1.72933	2.05233	2.20033	2.60133	2.54433	2.89	2.88667	3.09333	1.68233	2.02967	2.65833	2.43167	1.66133	1.963	1.29467	2.865	1.61067	2.35733	2.86333	2.423	2.76	2.6235	1.397	2.093	2.005	2.09167	1.758	1.40167
Gd	7.31667	6.96333	4.07333	4.29333	5.79	4.34	6.82667	4.59667	6.06	5.59	7.81	5.53667	7.38667	7.28333	3.96667	3.7	7.28	6.37	7.26333	4.07333	7.07	4.46333	5.92	6.11	6.49	6.63667	7.18	7.72	7.96333	4.54333	5.63333	6.77	6.11667	4.53667	5.1	3.58	7.09333	4.03667	5.95333	6.99333	5.87333	6.70333	6.50759	4.22202	6.14766	5.74	5.67	4.63	4.03667
Dy	5.66	5.58	3.51333	3.91333	4.60333	3.85333	4.66333	4.23	4.46667	4.48	5.73333	4.38333	5.20333	5.51	3.67667	3.26333	5.55333	4.45667	5.24333	3.61	5.25667	3.66	4.77333	4.99333	4.50333	4.93333	4.93333	5.63	5.36333	3.85667	4.51667	5.01667	4.54	3.85667	4.15	2.90667	4.78	3.49667	4.48333	4.59333	4.36	4.80667	4.76	3.91	4.48	4.71333	4.73667	3.91667	3.67333
Ho	1.00133	1.029	0.697333	0.765	0.842667	0.779	0.841667	0.804667	0.741667	0.830333	1.02467	0.824667	0.932	1.05433	0.745667	0.634333	0.98	0.781333	0.924667	0.685	0.950667	0.688333	0.895667	0.925	0.786	0.864	0.852667	1.00833	0.939	0.725667	0.828333	0.895667	0.802333	0.739333	0.801333	0.571667	0.846333	0.631333	0.784667	0.817	0.764	0.818	0.8365	0.7345	0.783	0.900333	0.841333	0.725667	0.713333
Er	2.63	2.58333	1.88967	2.05667	2.11667	1.978	1.98367	2.21333	1.889	2.21667	2.59667	2.13667	2.38	2.60667	1.90933	1.70467	2.47	1.90333	2.28533	1.87733	2.377	1.75967	2.31333	2.38767	2.06233	2.17	2.32	2.52333	2.29333	1.905	2.21333	2.238	2.073	1.86367	2.02633	1.46867	1.97233	1.683	1.95433	1.963	1.952	2.09533	1.945	1.972	2.1055	2.38	2.211	1.84733	1.87833
Tm	0.325667	0.316667	0.252667	0.278667	0.256	0.263333	0.256667	0.300667	0.232333	0.269667	0.321	0.273333	0.300333	0.305667	0.254667	0.221333	0.313667	0.239333	0.301667	0.249667	0.299333	0.216333	0.299	0.320667	0.2459	0.283	0.279333	0.308	0.288667	0.243333	0.279333	0.296333	0.265	0.241667	0.262	0.2041	0.249367	0.213567	0.243967	0.249333	0.2414	0.261333	0.2525	0.2745	0.2745	0.312333	0.27	0.235467	0.240133
Yb	1.98	2.06667	1.64133	1.81333	1.71333	1.845	1.53567	1.93	1.45633	1.76833	2.09933	1.74667	1.88533	1.99667	1.66	1.41067	2.02667	1.515	1.94967	1.594	1.88333	1.522	1.87	2.075	1.60467	1.76233	1.82667	1.95367	1.73333	1.54767	1.71833	1.83267	1.68733	1.57033	1.697	1.24733	1.56967	1.42333	1.653	1.57467	1.507	1.53233	1.5655	1.68533	1.795	1.94667	1.835	1.648	1.661
Lu	0.276667	0.274333	0.226333	0.249	0.223667	0.236333	0.212	0.266333	0.187733	0.234667	0.288	0.272	0.265667	0.273333	0.246	0.2092	0.262333	0.209367	0.259333	0.225333	0.254	0.209	0.271	0.277333	0.214933	0.227967	0.244333	0.273	0.229667	0.215	0.249	0.2314	0.230333	0.215	0.220667	0.168667	0.2096	0.188633	0.209133	0.198767	0.209167	0.207333	0.205	0.230667	0.2405	0.281	0.219833	0.2222	0.220867
Hf	4.87	4.97667	2.69667	3.02333	3.74667	2.90333	4.00667	3.15333	3.91333	4.02667	4.72667	3.92	4.92	4.90667	2.84233	2.41	4.63333	3.80333	4.72333	2.58333	4.28667	3.15	4.58	4.80667	3.36333	3.93333	4.93333	5.06333	4.79333	3.35333	3.38667	4.13667	4	3.17333	3.23	2.35067	4.53	3.31333	3.67	3.45333	3.82	4.17333	3.577	2.91635	4.41285	4.75	3.10667	3.36667	2.667
Ta	2.63667	2.35	1.13533	1.20967	2.06667	1.23633	1.884	1.322	1.98	2.059	2.903	1.54633	2.69233	2.505	0.985	0.934333	2.74333	2.04567	2.58	1.08133	2.45367	1.169	1.75833	2.053	1.68667	2.222	2.57867	2.76	2.74	1.19767	1.28967	2.36633	2.29567	1.279	1.36833	0.906	2.63433	1.123	2.18067	2.07033	1.78833	2.02	1.95833	1.1505	1.7045	1.907	1.285	1.469	1.20267
Th	3.25333	3.41	2.05	1.71867	2.94333	2.19733	2.64333	2.35333	2.323	1.582	3.35	1.723	3.7	3.30667	1.37267	1.40333	3.09333	3.09667	3.59667	1.60167	3.02	1.71467	2.65	3.06	3.23667	2.59033	3.19333	3.73667	4.83333	1.76867	1.975	2.86567	2.67133	1.784	1.98733	1.486	3.32667	1.719	2.69667	3.40667	2.473	2.74667	3.05667	2.115	2.645	2.75667	2.04433	1.37	1.666
U	0.853333	0.923333	0.593333	0.393	0.679	0.681667	0.823	0.559667	0.630333	0.474	1.07367	0.450667	1.098	0.931	0.394333	0.450333	0.869333	0.900667	1.06967	0.434	0.883333	0.530667	0.735333	0.950333	0.998333	0.821667	0.978333	0.983667	1.21333	0.432	0.562	0.874333	0.821	0.424333	0.665667	0.350667	0.946667	0.465	0.872	1.06633	0.742333	0.728	0.6265	0.560333	0.773	0.733	0.664333	0.483667	0.428333
[truncated: 5 more columns]

## Sheet: Table-S2
Cluster	Affiliated with geological sample (coordinates, Longitude/Latitude)	General location	Provenance	Geological data source
EWT 122, 137, 103, 83, 105, 136, 107	221-13 (35,48324/ 32,716)	West of the Sea of Galilee	Slope west of Yavneel	Gluhak & Rosenberg (2018)
EWT 138, 32, 101, 121, 98, 125, 91	264-13 (35,45926/ 32,79836)	West of the Sea of Galilee	Karne Hittim	Gluhak & Rosenberg (2018)
EWT 120, 19, 133, 200	333-15 (35,623608/ 32,934945)	North of the Sea of Galilee	Eastern slope of Korazim Block	Gluhak & Rosenberg (2018)
EWT 110, 71, 128	328-15 (35,616706/ 32,921281)	North of the Sea of Galilee	Eastern slope of Korazim Block	Gluhak & Rosenberg (2018)
Pairs
EWT 139, 53	387-18 (35,661003/ 32,807165),	East of the Sea of Galilee	Southern Golan, west of Bene Yehuda	This study
	392-18 (35,672558/ 32,793642),
	398-18 (35,688032/32,781784)
EWT 131, 97	384-18 (35,662486/ 32,817937), 389-18 (35,660108/ 32,805759)	East of the Sea of Galilee	Southern Golan west of Bene Yehuda	This study
EWT 41, 69	unclear affiliation	Yet unknown	Same extraction site	--
EWT 82, 89	unclear affiliation	Yet unknown	Same extraction site	--
EWT 39, 56	unclear affiliation	Yet unknown	Same extraction site	--
EWT 140, 99	unclear affiliation	Yet unknown	Same extraction site	--
EWT 102, 187	unclear affiliation	Yet unknown	Same extraction site	--
Individual items with determined provenance
EWT 118	140-13 (35,52901/ 32,56805)	South of the Sea of Galilee	Jordan Valley, west of Beit Yosef	Gluhak & Rosenberg (2018)
EWT 115	97-13 (35,49060/32,57047), 26-16 (35,517094/ 32,560762)	South of the Sea of Galilee	North of Beit She’an	Gluhak & Rosenberg (2018)
EWT 106	340-15 (35,619998/32,950133)	North of the Sea of Galilee	Eastern slope of Korazim Block	Gluhak & Rosenberg (2018)
EWT 84	247-17 (35,666798/32,882476)	Northeast of the Sea of Galilee	Cover Basalt of the Golan, collected along the Wadi east of crossing of road 92 and 869	Gluhak & Rosenberg (2018)
EWT 40	104-16 (35,573988/32,918193)	North of the Sea of Galilee	Korazim Block, north of Ammon	Gluhak & Rosenberg (2018)
EWT 48	386-15 (35,594071/32,9524)	North of the Sea of Galilee	Korazim-Block, South of Tuva Zangarija	Gluhak & Rosenberg (2018)
EWT 189	116-13 (35,51328/32,52479)	South of the Sea of Galilee	North of Bet She’an	Gluhak & Rosenberg (2018)
Individual items with undetermined provenance
EWT 22, 25, 27, 52, 59, 67, 90, 111, 114, 116, 124, 188		Yet unknown	Yet unknown
